# Supplementary material
Source: HighWire-hosted journal article supplement (https://jpet.aspetjournals.org/highwire/filestream/151540/field_highwire_adjunct_files/0/1301_supp_files.pdf)
Supplement: 1301_supp_files.pdf [file 1301_supp_files.pdf]

**SUPPLEMENTAL DATA**

Article Title: Cinnabarinic acid provides hepatoprotection against non-alcoholic fatty liver disease

Authors' Names: Nikhil Y. Patil, Iulia Rus, Emma Downing, Ashok Mandala, Jacob E. Friedman, Aditya D. Joshi

Journal Name: Journal of Pharmacology and Experimental Toxicology

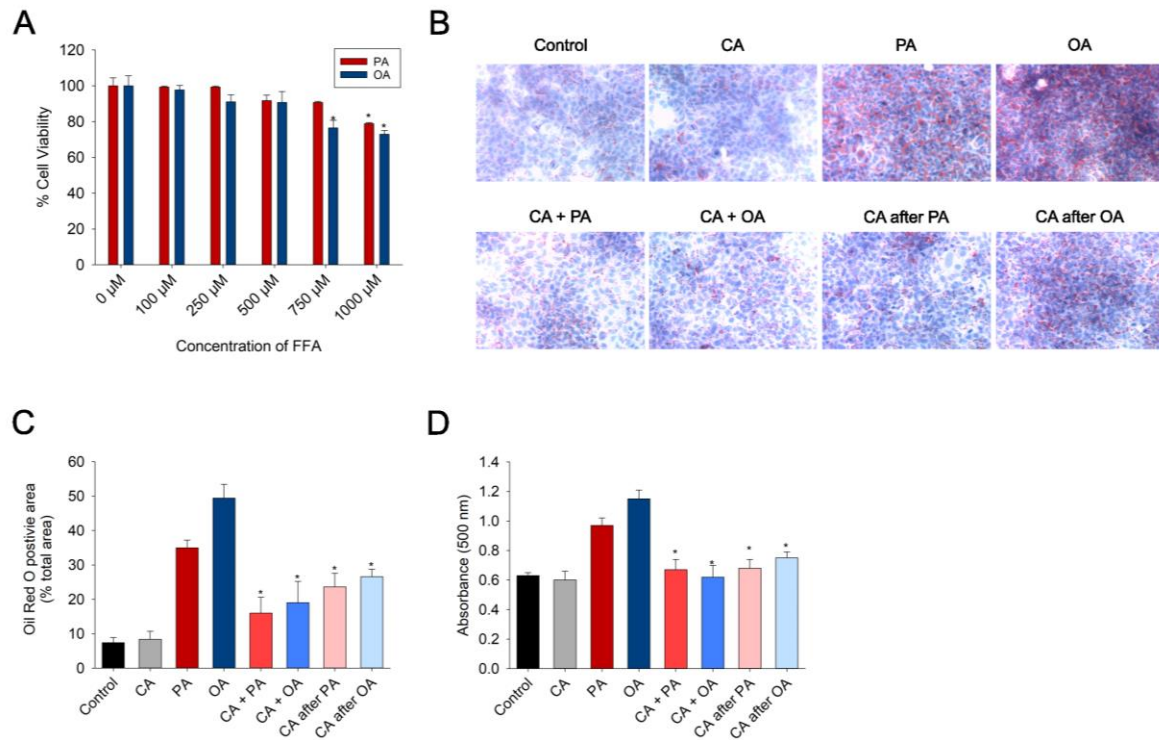

**Supplemental Figure 1.** Determination of (A) cell viability of AML12 cells treated with different concentrations of palmitic acid (PA) and oleic acid (OA) for 24 hrs. Cell viability was measured by a luminescent assay and expressed relative to BSA-treated control. Data are represented as mean  $\pm$  SD (n=3). \*p<0.05 compared to control group. (B) CA protects against palmitic acid (PA)/oleic acid (OA)-induced steatosis. Representative images of oil red O stained AML12 cells treated with 500 $\mu$ M BSA + DMSO (control), 30 $\mu$ M CA, 500 $\mu$ M PA, 500 $\mu$ M OA, 30 $\mu$ M CA+ 500 $\mu$ M PA/OA, 30 $\mu$ M CA after 500 $\mu$ M PA/OA. (C) Quantification of oil red O-stained images; area of stained lipid droplets was determined using ImageJ and normalized to the total area (3 images per treatment) (D) quantification of accumulated oil red O by colorimetry; absorbance measured at 500 nm. Data are represented as mean  $\pm$  SD (n=3). \*p<0.05 compared to PA/OA-only treatment group.

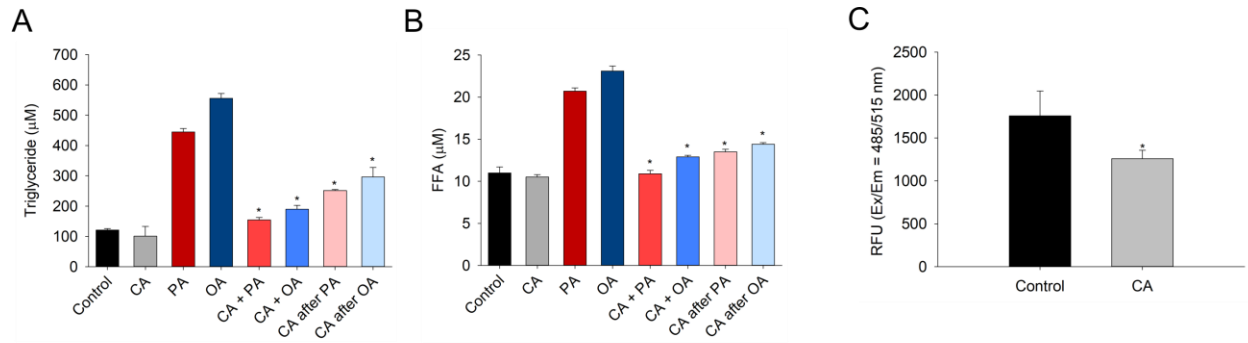

**Supplemental Figure 2.** Quantification of (A) triglyceride, (B) free fatty acid and (C) free fatty acid uptake in AML12 cells treated with 500µM BSA + DMSO (control), 30µM CA, 500µM PA, 500µM OA, 30µM CA+ 500µM PA/OA, 30µM CA after 500µM PA/OA. Triglyceride content was measured using luminescence assay, whereas free fatty acid content and free fatty acid uptake was determined fluorometrically. Data are represented as mean + SD (n=3). \*p<0.05 compared to PA/OA-only treatment group.

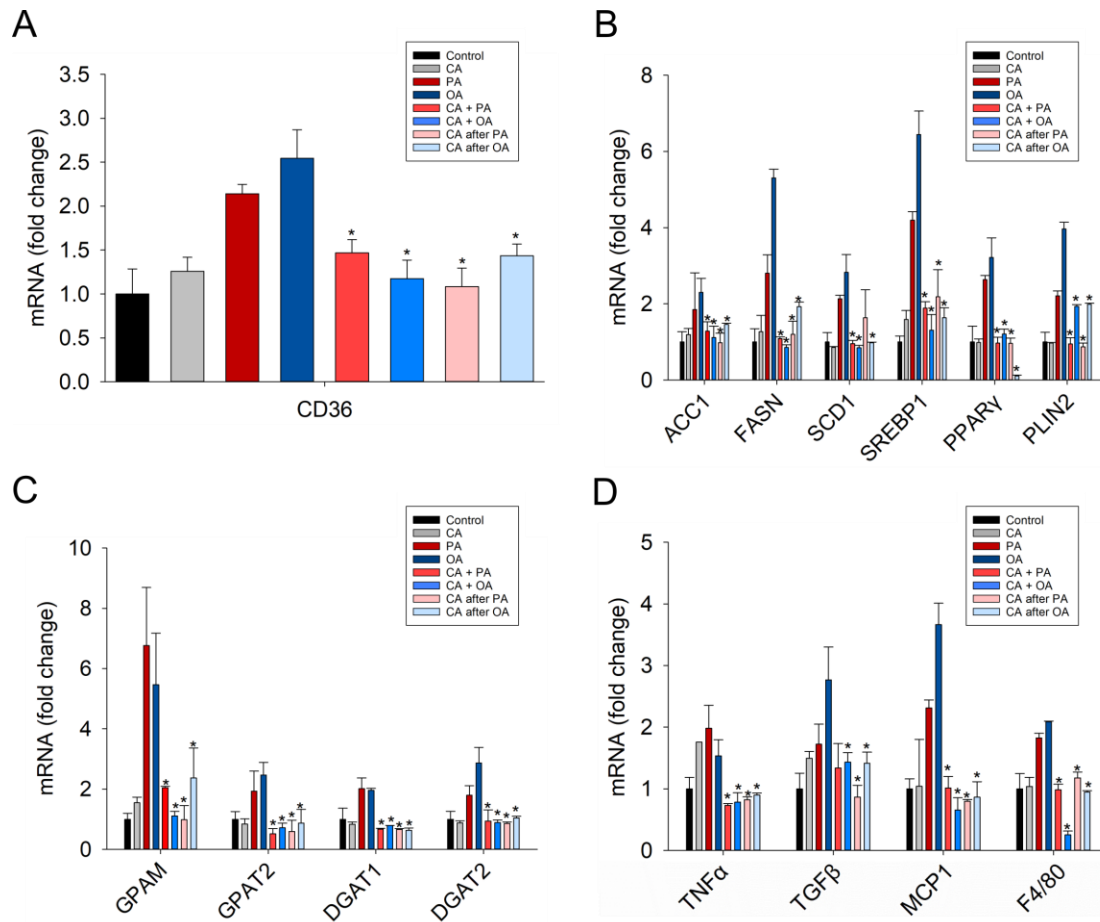

**Supplemental Figure 3.** Expression of mRNAs encoding genes involved in (A) free fatty acid transport, (B) fatty acid synthesis, (C) triglyceride synthesis, and (D) inflammation. AML12 cells were treated with 500 $\mu$ M BSA+ DMSO (control), 30 $\mu$ M CA, 500 $\mu$ M PA, 500 $\mu$ M OA, 30 $\mu$ M CA+ 500 $\mu$ M PA/OA , 30 $\mu$ M CA after 500 $\mu$ M PA/OA. mRNA message was analyzed by qRT-PCR and normalized to 18S rRNA. Results are expressed as fold of the value found in control treatment arbitrarily set at 1. For statistical analysis, a mixed-effects multivariate ANOVA (MANOVA) model was used. After an overall significant F test from MANOVA model, the post hoc multiple-comparison tests were performed for the pre-specified comparisons adjusted by Tukey procedure. Data are represented as mean  $\pm$  SD (n=3). \*p<0.05 compared to PA/OA-only treatment group.

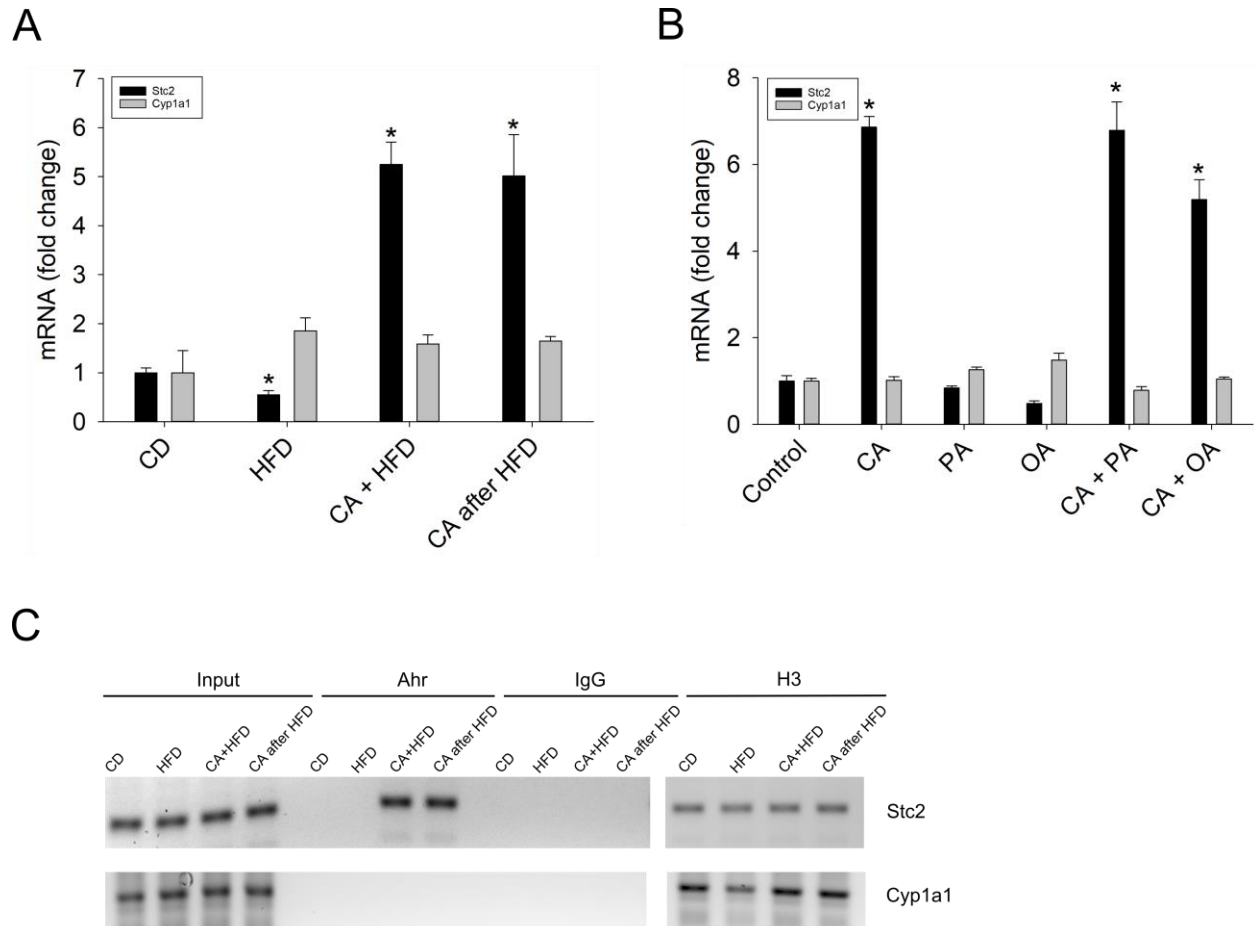

**Supplemental Figure 4.** CA treatment activates AhR signaling by upregulating Stc2 expression. mRNA expression of Stc2 and Cyp1a1 measured by qRT-PCR in (A) *in vivo* and (B) *in vitro* models of NAFLD, normalized to 18S rRNA. Data are represented as mean  $\pm$  SD. \* $p < 0.05$  compared to control diet (CD)/control group. (B) ChIP analysis of AhR binding to Stc2 and Cyp1a1 promoters in mice liver tissue. IgG and histone H3 antibodies were used as negative and positive controls respectively. The XRE clusters in the Stc2 and Cyp1a1 promoters (Patil et al., 2022) were PCR-amplified and PCR products separated and visualized on 5% polyacrylamide gels.

**Supplemental Table 1. Primer sequences for quantitative RT-PCR**

| Species | Gene          | Forward Primer           | Reverse primer           |
|---------|---------------|--------------------------|--------------------------|
| Human   | ACAA1         | GCGGTTCTCAAGGACGTGAAT    | GTCTCCGGGATGTCACTCAGA    |
| Mouse   | ACAA1         | CCAACATTGCTGGTGGCATC     | CCCATCCAGACAGGGACAT      |
| Human   | ACADL         | TGCAATAGCAATGACAGAGCC    | CGCAACTACAATCACAAATCAC   |
| Mouse   | ACADL         | TGCACACATACAGACGGTGC     | CATGGAAGCAGAACCGGAGT     |
| Human   | ACC1          | GCAGGTCACACGTCTCTTTAT    | CCAGCCTGTCATCCTCAATATC   |
| Mouse   | ACC1          | TAACAGAATCGACACTGGCTGGCT | ATGCTGTTCTCAGGCTCACATCT  |
| Human   | ACOX1         | TGCTGATGAAGTATGCCAGGTGA  | TCCCACAAGGAAGGACCTGACAAA |
| Mouse   | ACOX1         | TCATGTGGTTTAAAACTCTGTGC  | GCAGGAACATGCCCAAGTGA     |
| Human   | CD36          | AAACGGCTGCAGGTCAACCTATTG | TCATCACCAATGGTCCCAGTCTCA |
| Mouse   | CD36          | TCATGCCAGTCGGAGACATGCTTA | AACTGTCTGTACACAGTGGTGCCT |
| Human   | CPT1A         | GCAAAGGCGACATCAATCCGAACA | ACCAAAGGCTACGAATGGGAAGGA |
| Mouse   | CPT1A         | GTCCCTCCAGCTGGCTTATC     | CATGCGGCCAGTGGTGTCTA     |
| Human   | CPT2          | GCTGCCTATTCCTCAAACTTG    | CATGCAGTTCTTTTCCAATCCC   |
| Mouse   | CPT2          | TCGTACCCACCATGCACTAC     | CTTCTGTCTTCTGAACTGGCT    |
| Human   | DGAT1         | CCTACCGCGATCTCTACTACTT   | GGGTGAAGAACAGCATCTCAA    |
| Mouse   | DGAT1         | AACCTGGCCACAATCATCTGCTTC | ATGATGCCAGAGCAAACACGGAAC |
| Human   | DGAT2         | ATTGCTGGCTCATCGCTGT      | GGGAAAGTAGTCTCGAAAGTAGC  |
| Mouse   | DGAT2         | TTCTGCACAGACTGCTGGCTGATA | TCACCAGCTGGATGGGAAAGTAGT |
| Human   | F4/80         | CAGACCAAGGAGTGGAAATGTAG  | GCCTTCTGGATTGGGATGAA     |
| Mouse   | F4/80         | TCAAATGGATCCAGAAGGCTCCCA | TGCACTGCTTGGCATTGCTGTATC |
| Human   | FASN          | TACGACTACGGCCCTCATTT     | CCATGAAGCTCACCCAGTTATC   |
| Mouse   | FASN          | GGTGTGGTGGGTTTGGTGAATTGT | TTGCTGAGGTTGGACAGCAGGATA |
| Human   | GPAM          | CTAGCAAGTCTGTGCCATTA     | CGACCAATGTGGAGAGATCAA    |
| Mouse   | GPAM          | ATGAAACGCACACAAGGCAC     | CCCTTATGGACGTCTCGCTC     |
| Human   | GPAT2         | TGTGGTCGTCAGGCTTTGG      | GGTCCGTTATGCTTCTGTGGA    |
| Mouse   | GPAT2         | GCACATACCCACAGTTTTGA     | AGGATACGCTGTACCTCTTTCT   |
| Human   | MCP1          | TCGCTCAGCCAGATGCAATCAATG | CACAGCTTCTTTGGGACACTTGCT |
| Mouse   | MCP1          | TCACCTGCTGCTACTCATTACCA  | AGCACAGACCTCTCTTTGAGCTT  |
| Human   | MOGAT1        | AGGCCATGAAGGTAGAGTTTG    | CCCAGCAGCAGGTATTT        |
| Human   | PLIN2         | TTGCAGTTGCCAATACCTATGC   | CCAGTCACAGTAGTCGTCACA    |
| Mouse   | PLIN2         | CAGCTCTCCTGTTAGGCGT      | CGGAGGACACAAGGTGCTAG     |
| Human   | PPAR $\gamma$ | TACTGTCGGTTTCAGAAATGCC   | GTCAGCGGACTCTGGATTGAG    |
| Mouse   | PPAR $\gamma$ | AGGGCGATCTTGACAGGAAAGACA | AAATTCGGATGGCCACCTCTTTGC |
| Human   | RNA18S        | GGACAGGATTGACAGATTGAT    | AGTCTCGTTCGTTATCGGAAT    |
| Mouse   | RNA18S        | CTCAACACGGGAAACCTCAC     | CGCTCCACCAACTAAGAACG     |
| Human   | SCD1          | AACTGGTGATGTTCCAGAGGAGGT | CGCAAGAAAGTGGCAACGAACACA |
| Mouse   | SCD1          | CAGGTTTCCAAGCGCAGTTC     | ACTGGAGATCTCTTGAGCA      |
| Human   | SREBP1C       | GGAGCCATGGATTGCACTTT     | TCCCAGCATAGGGTGGGTCAAATA |

|       |              |                          |                          |
|-------|--------------|--------------------------|--------------------------|
| Mouse | SREBP1C      | GGAGCCATGGATTGCACATT     | GGCCCGGGAAGTCACTGT       |
| Human | TGF $\beta$  | GGAAATTGAGGGCTTTCGCC     | CCGGTAGTGAACCCGTTGAT     |
| Mouse | TGF $\beta$  | TAAAGAGGTCACCCGCGTGCTAAT | ACTGCTTCCCGAATGTCTGACGTA |
| Human | TNF $\alpha$ | GCCCATGTTGTAGCAAACCCTCAA | GTTATCTCTCAGCTCCACGCCATT |
| Mouse | TNF $\alpha$ | TAGCCACGTCGTAGCAAAC      | ACAAGGTACAACCCATCGGC     |

### Supplemental Table 2. Primer sequences for ChIP

| Species | Gene   | Forward Primer         | Reverse primer           |
|---------|--------|------------------------|--------------------------|
| Mouse   | CYP1A1 | CTATCTCTTAAACCCACCCCAA | CTAAGTATGGTGGAGGAAAGGGTG |
| Mouse   | STC2   | CTCAGTCCATTGGCCATTGCC  | AGGAAGCGGAGCGCCTCCGC     |
